# Supplementary material for: Determination of Flavonoids Compounds of Three Species and Different Harvesting Periods in Crataegi folium Based on LC-MS/MS
Source: PubMed Central journal article supplement (PMC7999497; doi:10.3390/molecules26061602), 2021-03-13
Supplement: molecules-26-01602-s001.pdf [file molecules-26-01602-s001.pdf]

Supplementary Data

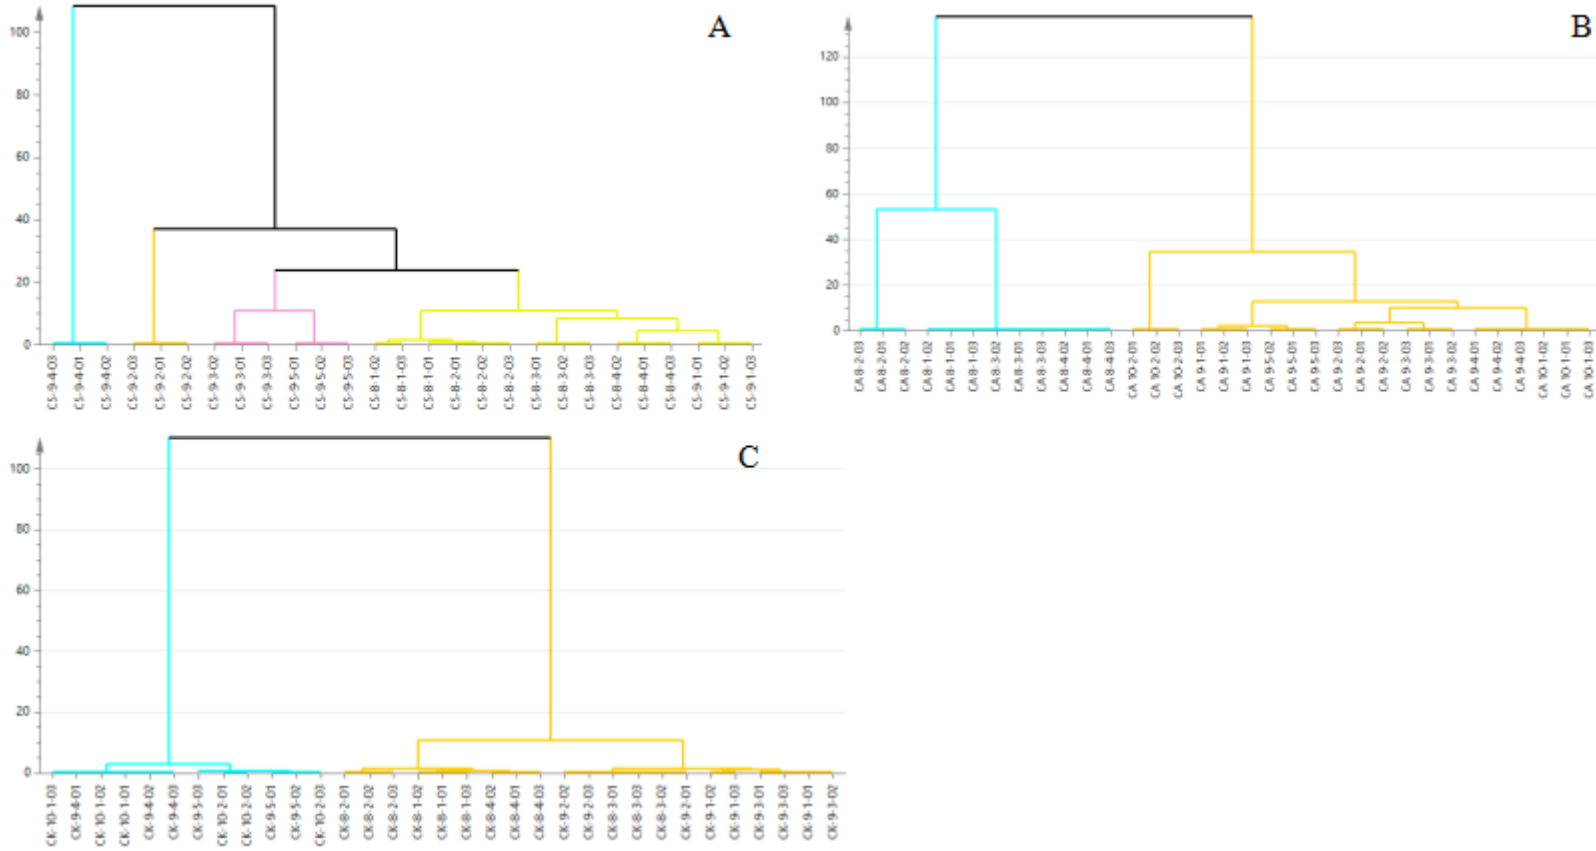

Fig. S1 The HCA plot in different harvesting period of the leaves of CS (A), CA(B), and CK (C).

Table S1 216 compounds information identified in the leaves of CS, CA and CK

| NO | compound name                                                              | Retention     |                      | Formula                                         | Mass           |          |
|----|----------------------------------------------------------------------------|---------------|----------------------|-------------------------------------------------|----------------|----------|
|    |                                                                            | time<br>(min) | Adducts              |                                                 | Error<br>(ppm) | m/z      |
| 1  | 1-ethyl malate                                                             | 0.61          | M-H <sub>2</sub> O-H | C <sub>6</sub> H <sub>10</sub> O <sub>5</sub>   | 2.36           | 143.0354 |
| 2  | papyriflavonol A                                                           | 0.63          | M+FA-H               | C <sub>25</sub> H <sub>26</sub> O <sub>7</sub>  | 7.46           | 483.1693 |
| 3  | $\alpha$ -D-gal-(1→3)- $\alpha$ -D-gal-OMe                                 | 0.64          | M-H <sub>2</sub> O-H | C <sub>13</sub> H <sub>24</sub> O <sub>11</sub> | -2.53          | 337.1131 |
| 4  | 6-O-galloyl-D-glucopyranose                                                | 0.66          | M-H <sub>2</sub> O-H | C <sub>13</sub> H <sub>16</sub> O <sub>10</sub> | 3.31           | 313.0576 |
| 5  | Gallic acid                                                                | 0.67          | M-H                  | C <sub>7</sub> H <sub>6</sub> O <sub>5</sub>    | -4.61          | 169.0135 |
| 6  | cis-Miyabenol C                                                            | 0.79          | M+FA-H               | C <sub>42</sub> H <sub>32</sub> O <sub>9</sub>  | -2.42          | 725.2012 |
| 7  | (2S,3S,4S,5R)-3,4,5-Trihydroxy-6-oxidotetrahydro-2H-pyran-2-carboxylate    | 0.80          | M-H                  | C <sub>6</sub> H <sub>8</sub> O <sub>7</sub>    | 0.18           | 191.0201 |
| 8  | (2S)-Hex-2-ulofuranosyl-4,6-dideoxyhexopyranoside                          | 0.96          | M-H                  | C <sub>12</sub> H <sub>22</sub> O <sub>9</sub>  | 2.92           | 309.1200 |
| 9  | $\beta$ -D-Glucopyranose                                                   | 0.97          | M-H                  | C <sub>6</sub> H <sub>12</sub> O <sub>6</sub>   | 1.93           | 179.0565 |
| 10 | 4-Hydroxybenzoic acid                                                      | 1.19          | M-H                  | C <sub>7</sub> H <sub>6</sub> O <sub>3</sub>    | 0.73           | 137.0245 |
| 11 | 7,3',4'-tri-O-methyluteolin                                                | 1.21          | M-H                  | C <sub>18</sub> H <sub>16</sub> O <sub>6</sub>  | -4.10          | 327.0861 |
| 12 | Glucogallin                                                                | 1.24          | M-H                  | C <sub>13</sub> H <sub>16</sub> O <sub>10</sub> | 6.54           | 331.0692 |
| 13 | Benzoic acid                                                               | 1.57          | M+FA-H               | C <sub>7</sub> H <sub>6</sub> O <sub>2</sub>    | 2.61           | 167.0353 |
| 14 | (4S)-4,5,8-trihydroxy- $\alpha$ -tetralone-4-O- $\beta$ -D-glucopyranoside | 1.63          | M+FA-H               | C <sub>16</sub> H <sub>20</sub> O <sub>9</sub>  | 2.86           | 401.1100 |
| 15 | Piscidic acid                                                              | 1.63          | M-H                  | C <sub>11</sub> H <sub>12</sub> O <sub>7</sub>  | 4.40           | 255.0522 |
| 16 | rhoiptelol B                                                               | 1.70          | M-H <sub>2</sub> O-H | C <sub>20</sub> H <sub>24</sub> O <sub>6</sub>  | 0.77           | 341.1397 |
| 17 | (4R)-5,8-dihydroxy-4-methoxy- $\alpha$ -tetralone                          | 2.09          | M-H <sub>2</sub> O-H | C <sub>11</sub> H <sub>12</sub> O <sub>4</sub>  | 2.18           | 189.0562 |
| 18 | Syringic acid                                                              | 2.18          | M-H <sub>2</sub> O-H | C <sub>9</sub> H <sub>10</sub> O <sub>5</sub>   | 2.79           | 179.0355 |
| 19 | Veratric acid                                                              | 2.32          | M-H <sub>2</sub> O-H | C <sub>9</sub> H <sub>10</sub> O <sub>4</sub>   | 2.90           | 163.0406 |
| 20 | eucomic acid                                                               | 2.50          | M+FA-H               | C <sub>11</sub> H <sub>12</sub> O <sub>6</sub>  | 3.75           | 285.0625 |

|    |                                                                                                                           |      |                      |                                                 |       |          |
|----|---------------------------------------------------------------------------------------------------------------------------|------|----------------------|-------------------------------------------------|-------|----------|
| 21 | 2-Propylsuccinic acid                                                                                                     | 2.65 | M+FA-H               | C <sub>7</sub> H <sub>12</sub> O <sub>4</sub>   | 4.50  | 205.0725 |
| 22 | 4-hydroxybenzoic acid methyl ester                                                                                        | 2.65 | M-H                  | C <sub>8</sub> H <sub>8</sub> O <sub>3</sub>    | 2.98  | 151.0405 |
| 23 | 3',7-O-diglucoside luteolin                                                                                               | 2.70 | M+FA-H               | C <sub>27</sub> H <sub>30</sub> O <sub>16</sub> | 2.40  | 655.1530 |
| 24 | 3,4-Dihydroxybenzoic acid                                                                                                 | 2.87 | M-H                  | C <sub>7</sub> H <sub>6</sub> O <sub>4</sub>    | 2.12  | 153.0197 |
| 25 | Ethyl 3-methoxy-4-hydroxybenzoate                                                                                         | 2.89 | M-H <sub>2</sub> O-H | C <sub>10</sub> H <sub>12</sub> O <sub>4</sub>  | 0.83  | 177.0559 |
| 26 | p-methoxyphenylacetic acid                                                                                                | 2.90 | M-H <sub>2</sub> O-H | C <sub>8</sub> H <sub>8</sub> O <sub>3</sub>    | 0.64  | 133.0296 |
| 27 | iso-orientin                                                                                                              | 3.09 | M+FA-H               | C <sub>21</sub> H <sub>20</sub> O <sub>11</sub> | 4.78  | 493.1009 |
| 28 | (4S)-4,5,8-trihydroxy- $\alpha$ -tetralone 5-O- $\beta$ -D-glucopyranoside                                                | 3.18 | M+FA-H               | C <sub>16</sub> H <sub>20</sub> O <sub>9</sub>  | 2.17  | 401.1097 |
| 29 | loliolide                                                                                                                 | 3.23 | M+FA-H               | C <sub>11</sub> H <sub>16</sub> O <sub>3</sub>  | 4.19  | 241.1090 |
| 30 | 5-Hydroxy-2-(4-hydroxyphenyl)-6-methoxy-4-oxo-4H-chromen-7-yl<br>6-O-[(2E)-3-(4-hydroxyphenyl)-2-propenoyl]hexopyranoside | 3.33 | M-H <sub>2</sub> O-H | C <sub>31</sub> H <sub>28</sub> O <sub>13</sub> | 0.89  | 589.1357 |
| 31 | Caffeic acid                                                                                                              | 3.57 | M-H <sub>2</sub> O-H | C <sub>9</sub> H <sub>8</sub> O <sub>4</sub>    | 4.23  | 161.0252 |
| 32 | 6-O-acetyl-4-O-[6-O-acetyl-3-O-(2-carboxybenzoyl)-beta-D-glucopyranosyl]-2-O-(2-carb<br>oxybenzoyl)-beta-D-glucopyranose  | 3.58 | M-H <sub>2</sub> O-H | C <sub>32</sub> H <sub>34</sub> O <sub>19</sub> | 2.70  | 703.1535 |
| 33 | Quinic acid                                                                                                               | 3.59 | M-H <sub>2</sub> O-H | C <sub>7</sub> H <sub>12</sub> O <sub>6</sub>   | 3.51  | 173.0462 |
| 34 | methyl 4-hydroxyphenylacetate                                                                                             | 3.67 | M-H                  | C <sub>9</sub> H <sub>10</sub> O <sub>3</sub>   | 1.14  | 165.0559 |
| 35 | 4-Hydroxycinnamic acid                                                                                                    | 3.71 | M-H                  | C <sub>9</sub> H <sub>8</sub> O <sub>3</sub>    | 2.37  | 163.0405 |
| 36 | Epipinoresinol                                                                                                            | 3.75 | M+FA-H               | C <sub>20</sub> H <sub>22</sub> O <sub>6</sub>  | -1.56 | 403.1393 |
| 37 | 5,7-dihydroxychromone                                                                                                     | 3.81 | M-H                  | C <sub>9</sub> H <sub>6</sub> O <sub>4</sub>    | 4.59  | 177.0201 |
| 38 | 3,4,5-Trimethoxyphenyl hexopyranoside                                                                                     | 3.86 | M+FA-H               | C <sub>15</sub> H <sub>22</sub> O <sub>9</sub>  | 3.50  | 391.1258 |
| 39 | 2-succinyl-6-hydroxycyclohexa-2,4-diene-1-carboxylic acid                                                                 | 4.01 | M-H                  | C <sub>11</sub> H <sub>12</sub> O <sub>6</sub>  | 3.62  | 239.0573 |
| 40 | Pinnatifinoside F                                                                                                         | 4.01 | M+FA-H               | C <sub>23</sub> H <sub>20</sub> O <sub>10</sub> | -0.89 | 501.1034 |
| 41 | 5-( $\beta$ -D-Glucopyranosyloxy)-2-hydroxybenzoic acid                                                                   | 4.05 | M-H <sub>2</sub> O-H | C <sub>13</sub> H <sub>16</sub> O <sub>9</sub>  | 4.36  | 297.0630 |
| 42 | trans-coumaric acid methyl ester                                                                                          | 4.05 | M-H                  | C <sub>9</sub> H <sub>8</sub> O <sub>3</sub>    | 1.42  | 163.0403 |
| 43 | 1-O-sinapoyl- $\beta$ -D-glucose                                                                                          | 4.11 | M-H                  | C <sub>17</sub> H <sub>22</sub> O <sub>10</sub> | 4.64  | 431.1221 |

|    |                                                                                                                                                                |      |                           |                                                 |       |          |
|----|----------------------------------------------------------------------------------------------------------------------------------------------------------------|------|---------------------------|-------------------------------------------------|-------|----------|
| 44 | Poncirin                                                                                                                                                       | 4.15 | M+FA-H                    | C <sub>28</sub> H <sub>34</sub> O <sub>14</sub> | -1.40 | 639.1922 |
| 45 | herbacetin-3,8-diglucopyranoside                                                                                                                               | 4.21 | M+FA-H                    | C <sub>27</sub> H <sub>30</sub> O <sub>17</sub> | 4.36  | 671.1492 |
| 46 | CSID28481414                                                                                                                                                   | 4.23 | M-H <sub>2</sub> O-H      | C <sub>32</sub> H <sub>38</sub> O <sub>18</sub> | 1.48  | 691.1890 |
| 47 | broussonol E                                                                                                                                                   | 4.26 | M-H <sub>2</sub> O-H      | C <sub>25</sub> H <sub>26</sub> O <sub>7</sub>  | 3.38  | 419.1515 |
| 48 | 4-(β-D-glucosyloxy)benzoic acid                                                                                                                                | 4.32 | M-H <sub>2</sub> O-H      | C <sub>13</sub> H <sub>16</sub> O <sub>8</sub>  | 3.22  | 281.0676 |
| 49 | 1-(Hexopyranosyloxy)-1,4α,5,6,7,7α-hexahydrocyclopenta[c]pyran-7-carboxylic acid                                                                               | 4.41 | M+FA-H                    | C <sub>15</sub> H <sub>22</sub> O <sub>9</sub>  | 1.77  | 391.1252 |
| 50 | (3R,5S,6S,7E,9S)-Megastigman-7-ene-3,5,6,9-tetrol-9-O-β-D-glucopyranoside                                                                                      | 4.49 | M+FA-H                    | C <sub>19</sub> H <sub>34</sub> O <sub>9</sub>  | 0.12  | 451.2185 |
| 51 | 1-({6-O-[3,4-Dihydroxy-4-(hydroxymethyl)tetrahydro-2-furanyl]hexopyranosyl}oxy)-7-hydroxy-7-methyl-1,4a,5,6,7,7a-hexahydrocyclopenta[c]pyran-4-carboxylic acid | 4.52 | M-H <sub>2</sub> O-H      | C <sub>21</sub> H <sub>32</sub> O <sub>14</sub> | 0.22  | 489.1615 |
| 52 | Procyanidin B1                                                                                                                                                 | 4.69 | M-H <sub>2</sub> O-H, M-H | C <sub>30</sub> H <sub>26</sub> O <sub>12</sub> | -3.90 | 577.1354 |
| 53 | Vanillin                                                                                                                                                       | 4.96 | M-H <sub>2</sub> O-H      | C <sub>8</sub> H <sub>8</sub> O <sub>3</sub>    | 1.53  | 133.0297 |
| 54 | bis-(2-hydroxyethyl)terephthalate                                                                                                                              | 4.96 | M-H                       | C <sub>12</sub> H <sub>12</sub> O <sub>6</sub>  | 0.90  | 297.0624 |
| 55 | 3,5-Dimethoxyethyl p-hydroxybenzoate                                                                                                                           | 5.01 | M-H <sub>2</sub> O-H      | C <sub>11</sub> H <sub>14</sub> O <sub>5</sub>  | 2.16  | 207.0668 |
| 56 | 4α,5,8-trihydroxy-α-tetralone-5-O-β-D-[6'-O-(3'',5''-dimethoxy-4''-hydroxybenzoyl)]glucopyranoside                                                             | 5.01 | M-H <sub>2</sub> O-H      | C <sub>25</sub> H <sub>28</sub> O <sub>13</sub> | -2.18 | 517.1340 |
| 57 | Syringetin 3-O-galactoside                                                                                                                                     | 5.02 | M+FA-H                    | C <sub>23</sub> H <sub>24</sub> O <sub>13</sub> | 3.07  | 553.1215 |
| 58 | Juglanosides F                                                                                                                                                 | 5.06 | M-H <sub>2</sub> O-H      | C <sub>22</sub> H <sub>28</sub> O <sub>13</sub> | 3.43  | 481.1369 |
| 59 | 1β,3α,12β,20(S)-tetrol-24-ene-dammar                                                                                                                           | 5.23 | M+FA-H                    | C <sub>30</sub> H <sub>52</sub> O <sub>4</sub>  | -2.17 | 521.3837 |
| 60 | Troxerutin                                                                                                                                                     | 5.25 | M+FA-H                    | C <sub>33</sub> H <sub>42</sub> O <sub>19</sub> | 4.40  | 787.2335 |
| 61 | Evofolin B                                                                                                                                                     | 5.26 | M+FA-H                    | C <sub>17</sub> H <sub>18</sub> O <sub>6</sub>  | -0.10 | 363.1085 |
| 62 | Chlorogenic acid                                                                                                                                               | 5.52 | M-H                       | C <sub>16</sub> H <sub>18</sub> O <sub>9</sub>  | 2.39  | 353.0887 |
| 63 | icariin                                                                                                                                                        | 5.54 | M+FA-H                    | C <sub>33</sub> H <sub>40</sub> O <sub>15</sub> | -2.52 | 721.2332 |
| 64 | p-Hydroxy-cinnamic acid                                                                                                                                        | 5.69 | M-H                       | C <sub>9</sub> H <sub>8</sub> O <sub>3</sub>    | 3.86  | 163.0407 |
| 65 | methyl-4-Ocomaroylquininate                                                                                                                                    | 5.82 | M+FA-H                    | C <sub>17</sub> H <sub>20</sub> O <sub>8</sub>  | 4.03  | 397.1154 |
| 66 | menadione                                                                                                                                                      | 5.97 | M+FA-H                    | C <sub>11</sub> H <sub>8</sub> O <sub>2</sub>   | 2.73  | 217.0511 |

|    |                                                                                                                                                          |      |                      |                                                 |       |          |
|----|----------------------------------------------------------------------------------------------------------------------------------------------------------|------|----------------------|-------------------------------------------------|-------|----------|
| 67 | procyanidin B2                                                                                                                                           | 6.45 | M-H <sub>2</sub> O-H | C <sub>30</sub> H <sub>26</sub> O <sub>12</sub> | 1.44  | 559.1254 |
| 68 | 5'-O-(E-4-coumaroyl)-quinic acid                                                                                                                         | 6.63 | M-H <sub>2</sub> O-H | C <sub>16</sub> H <sub>18</sub> O <sub>8</sub>  | 3.64  | 319.0836 |
| 69 | massonioside D                                                                                                                                           | 6.95 | M+FA-H               | C <sub>26</sub> H <sub>34</sub> O <sub>10</sub> | -0.62 | 551.2131 |
| 70 | Procyanidin C1                                                                                                                                           | 7.00 | M-H                  | C <sub>45</sub> H <sub>38</sub> O <sub>18</sub> | 4.79  | 865.2027 |
| 71 | syringaresinol                                                                                                                                           | 7.17 | M-H                  | C <sub>22</sub> H <sub>26</sub> O <sub>8</sub>  | -3.08 | 417.1542 |
| 72 | mudanoside A                                                                                                                                             | 7.22 | M-H <sub>2</sub> O-H | C <sub>14</sub> H <sub>18</sub> O <sub>9</sub>  | 4.30  | 311.0787 |
| 73 | 2,5-dihydroxy methyl phenylacetate                                                                                                                       | 7.26 | M-H <sub>2</sub> O-H | C <sub>9</sub> H <sub>10</sub> O <sub>4</sub>   | 2.60  | 163.0405 |
| 74 | protocatechuic acid methyl ester                                                                                                                         | 7.27 | M-H                  | C <sub>8</sub> H <sub>8</sub> O <sub>4</sub>    | 2.05  | 167.0353 |
| 75 | 4-O-β-D-glucopyranosylvanillic acid                                                                                                                      | 7.28 | M-H                  | C <sub>14</sub> H <sub>18</sub> O <sub>9</sub>  | 4.04  | 329.0891 |
| 76 | CSID5024                                                                                                                                                 | 7.48 | M-H                  | C <sub>25</sub> H <sub>22</sub> O <sub>10</sub> | -3.20 | 481.1125 |
| 77 | afzelechin                                                                                                                                               | 7.61 | M-H                  | C <sub>15</sub> H <sub>14</sub> O <sub>5</sub>  | 4.50  | 273.0781 |
| 78 | 3'-O-arabinosyl quercetin                                                                                                                                | 7.84 | M-H                  | C <sub>20</sub> H <sub>18</sub> O <sub>11</sub> | 2.27  | 433.0786 |
| 79 | (4S)-4,6-dihydroxy-α-tetralone-4-O-β-D-glucopyranoside                                                                                                   | 7.86 | M+FA-H               | C <sub>16</sub> H <sub>20</sub> O <sub>8</sub>  | 1.25  | 385.1144 |
| 80 | Procyanidin                                                                                                                                              | 7.93 | M-H <sub>2</sub> O-H | C <sub>30</sub> H <sub>26</sub> O <sub>13</sub> | 3.85  | 575.1218 |
| 81 | 4-methoxy-α-tetralone-5-O-α-glucopyranoside                                                                                                              | 7.97 | M+FA-H               | C <sub>17</sub> H <sub>22</sub> O <sub>8</sub>  | 2.02  | 399.1304 |
| 82 | (Z)-3-Hexenyl-O-β-D-xylopyranosyl-(1"→6')-β-D-glucopyranoside                                                                                            | 8.02 | M+FA-H               | C <sub>17</sub> H <sub>30</sub> O <sub>10</sub> | 0.27  | 439.1822 |
| 83 | Neoferiocitrin                                                                                                                                           | 8.26 | M+FA-H               | C <sub>27</sub> H <sub>32</sub> O <sub>15</sub> | 4.70  | 641.1751 |
| 84 | luteolin                                                                                                                                                 | 8.32 | M-H                  | C <sub>15</sub> H <sub>10</sub> O <sub>6</sub>  | 4.56  | 285.0418 |
| 85 | quercitrin                                                                                                                                               | 8.47 | M-H                  | C <sub>21</sub> H <sub>20</sub> O <sub>11</sub> | 2.04  | 447.0942 |
| 86 | breynioside A                                                                                                                                            | 8.53 | M+FA-H               | C <sub>19</sub> H <sub>20</sub> O <sub>9</sub>  | 2.50  | 437.1099 |
| 87 | (4S)-4-hydroxy-α-tetralone-4-O-β-D-glucopyranoside                                                                                                       | 8.73 | M+FA-H               | C <sub>16</sub> H <sub>20</sub> O <sub>7</sub>  | 3.49  | 369.1202 |
| 88 | 1-O-vanilloyl-β-D-glucose                                                                                                                                | 8.81 | M-H <sub>2</sub> O-H | C <sub>14</sub> H <sub>18</sub> O <sub>9</sub>  | 4.18  | 311.0786 |
| 89 | Rutin                                                                                                                                                    | 8.88 | M-H                  | C <sub>27</sub> H <sub>30</sub> O <sub>16</sub> | 0.94  | 609.1467 |
| 90 | 3-[[[(2R,3S,4S)-3,4-Dihydroxy-4-(hydroxymethyl)tetrahydro-2-furanyl]oxy]-5-hydroxy-2-(4-hydroxyphenyl)-4-oxo-4H-chromen-7-yl 6-deoxy-α-L-mannopyranoside | 8.91 | M-H                  | C <sub>26</sub> H <sub>28</sub> O <sub>14</sub> | 0.05  | 563.1406 |

|     |                                                                                                                                                                                                  |       |                      |                                                 |       |          |
|-----|--------------------------------------------------------------------------------------------------------------------------------------------------------------------------------------------------|-------|----------------------|-------------------------------------------------|-------|----------|
| 91  | (2R)-2-(3,4-Dihydroxyphenyl)-7-hydroxy-4-oxo-3,4-dihydro-2H-chromen-5-yl<br>2-O-beta-D-glucopyranosyl-beta-D-glucopyranoside                                                                     | 9.10  | M-H                  | C <sub>27</sub> H <sub>32</sub> O <sub>16</sub> | -7.91 | 611.1569 |
| 92  | 2-(3,4-Dihydroxyphenyl)-5,7-dihydroxy-6-methoxy-4-oxo-4H-chromen-3-yl<br>2-O-((2S,3R,4R)-4-[(alpha-L-arabinopyranosyloxy)methyl]-3,4-dihydroxytetrahydro-2-fu<br>ranyl)-beta-D-galactopyranoside | 9.15  | M-H <sub>2</sub> O-H | C <sub>32</sub> H <sub>38</sub> O <sub>21</sub> | -5.18 | 739.1688 |
| 93  | 3-O-neohesperidoside kaempferol                                                                                                                                                                  | 9.19  | M+FA-H               | C <sub>27</sub> H <sub>30</sub> O <sub>15</sub> | -2.11 | 639.1554 |
| 94  | (7S,8R)-dihydrodehydrodiconiferyl alcohol<br>9-O-beta-D-apiofuranosyl-O-beta-D-glucopyranoside                                                                                                   | 9.19  | M-H                  | C <sub>31</sub> H <sub>42</sub> O <sub>15</sub> | 0.89  | 653.2457 |
| 95  | 3-O-rhamnoside taxifolin                                                                                                                                                                         | 9.24  | M-H                  | C <sub>21</sub> H <sub>22</sub> O <sub>10</sub> | 1.32  | 433.1146 |
| 96  | Carlinoside                                                                                                                                                                                      | 9.25  | M-H                  | C <sub>26</sub> H <sub>28</sub> O <sub>15</sub> | 1.61  | 579.1365 |
| 97  | 1,3,5,6-tetrahydroxy-4,7,8-tri(3-methyl-2-butenyl)xanthone                                                                                                                                       | 9.36  | M+FA-H               | C <sub>28</sub> H <sub>32</sub> O <sub>6</sub>  | 9.32  | 509.2224 |
| 98  | 7-O-rhamnogalactoside quercetin                                                                                                                                                                  | 9.48  | M-H                  | C <sub>27</sub> H <sub>30</sub> O <sub>16</sub> | 0.42  | 609.1464 |
| 99  | 3,6-dihydroxy-4,5-dimethoxy-1,8-naphthalic anhydride                                                                                                                                             | 9.49  | M-H <sub>2</sub> O-H | C <sub>14</sub> H <sub>10</sub> O <sub>7</sub>  | 2.79  | 271.0256 |
| 100 | eupatilin                                                                                                                                                                                        | 9.64  | M-H                  | C <sub>18</sub> H <sub>16</sub> O <sub>7</sub>  | 1.95  | 343.0830 |
| 101 | isoengeletin                                                                                                                                                                                     | 9.65  | M-H                  | C <sub>21</sub> H <sub>22</sub> O <sub>10</sub> | 0.18  | 433.1141 |
| 102 | 5,3'-O-diglucoside-eriodictyol                                                                                                                                                                   | 9.75  | M-H <sub>2</sub> O-H | C <sub>27</sub> H <sub>32</sub> O <sub>16</sub> | 0.80  | 593.1517 |
| 103 | hesperetin                                                                                                                                                                                       | 9.79  | M-H                  | C <sub>16</sub> H <sub>14</sub> O <sub>6</sub>  | 4.28  | 301.0731 |
| 104 | myricetin-3-O-beta-D-galactopyranoside                                                                                                                                                           | 9.90  | M-H                  | C <sub>21</sub> H <sub>20</sub> O <sub>13</sub> | 1.01  | 479.0836 |
| 105 | 6-C-glucosyl-8-C-xylsoyl apigenin                                                                                                                                                                | 10.00 | M+FA-H               | C <sub>26</sub> H <sub>28</sub> O <sub>14</sub> | 1.36  | 609.1469 |
| 106 | Caffeic acid methyl ester                                                                                                                                                                        | 10.01 | M-H                  | C <sub>10</sub> H <sub>10</sub> O <sub>4</sub>  | 3.79  | 193.0514 |
| 107 | 3,5-dihydroxy-1,4-naphthoquinone                                                                                                                                                                 | 10.06 | M-H                  | C <sub>10</sub> H <sub>6</sub> O <sub>4</sub>   | 0.90  | 189.0195 |
| 108 | Jaceidin                                                                                                                                                                                         | 10.06 | M-H <sub>2</sub> O-H | C <sub>18</sub> H <sub>16</sub> O <sub>8</sub>  | 2.69  | 341.0676 |
| 109 | juglone                                                                                                                                                                                          | 10.06 | M+FA-H               | C <sub>10</sub> H <sub>6</sub> O <sub>3</sub>   | 1.14  | 219.0301 |
| 110 | eriodictyol                                                                                                                                                                                      | 10.26 | M-H <sub>2</sub> O-H | C <sub>15</sub> H <sub>12</sub> O <sub>6</sub>  | 0.68  | 269.0457 |
| 111 | 3-O-glucuronide-Quercetin                                                                                                                                                                        | 10.50 | M-H                  | C <sub>21</sub> H <sub>18</sub> O <sub>13</sub> | 2.84  | 477.0688 |

|     |                                                                                      |       |                      |                                                 |       |          |
|-----|--------------------------------------------------------------------------------------|-------|----------------------|-------------------------------------------------|-------|----------|
| 112 | isoquercitrin                                                                        | 10.58 | M-H                  | C <sub>21</sub> H <sub>20</sub> O <sub>11</sub> | 2.65  | 447.0945 |
| 113 | pinobanksin                                                                          | 10.58 | M-H                  | C <sub>15</sub> H <sub>12</sub> O <sub>6</sub>  | 3.36  | 287.0571 |
| 114 | Vitexin-2''-O-rhamnosyl                                                              | 10.68 | M-H                  | C <sub>27</sub> H <sub>30</sub> O <sub>14</sub> | 0.30  | 577.1565 |
| 115 | vitexin                                                                              | 10.70 | M-H <sub>2</sub> O-H | C <sub>21</sub> H <sub>20</sub> O <sub>10</sub> | 4.34  | 413.0897 |
| 116 | Vitexin-2''-O-glucosyl                                                               | 10.72 | M-H                  | C <sub>27</sub> H <sub>30</sub> O <sub>15</sub> | 0.66  | 593.1516 |
| 117 | 6-C-xylsoyl-8-C-glucosyl apigenin                                                    | 11.11 | M-H                  | C <sub>26</sub> H <sub>28</sub> O <sub>14</sub> | 2.82  | 563.1422 |
| 118 | colorless associated guinea                                                          | 11.21 | M-H                  | C <sub>15</sub> H <sub>14</sub> O <sub>6</sub>  | 4.31  | 289.0730 |
| 119 | Multiflorin B                                                                        | 11.23 | M-H                  | C <sub>27</sub> H <sub>30</sub> O <sub>15</sub> | 1.48  | 593.1520 |
| 120 | Avicularin                                                                           | 11.45 | M-H                  | C <sub>20</sub> H <sub>18</sub> O <sub>11</sub> | 9.41  | 433.0817 |
| 121 | chrysophanol                                                                         | 11.48 | M+FA-H               | C <sub>15</sub> H <sub>10</sub> O <sub>4</sub>  | 1.57  | 299.0565 |
| 122 | Vitexin-2''-O-(4-O-acetyl)-rhamnosyl                                                 | 11.56 | M-H                  | C <sub>29</sub> H <sub>32</sub> O <sub>15</sub> | 2.51  | 619.1684 |
| 123 | 1-O-galloyl-β-D-glucopyranose                                                        | 11.87 | M-H <sub>2</sub> O-H | C <sub>15</sub> H <sub>20</sub> O <sub>10</sub> | -4.66 | 341.0861 |
| 124 | Coumarin                                                                             | 11.99 | M-H                  | C <sub>9</sub> H <sub>6</sub> O <sub>2</sub>    | 2.71  | 145.0299 |
| 125 | pinnatifidin                                                                         | 12.00 | M-H                  | C <sub>21</sub> H <sub>20</sub> O <sub>11</sub> | -0.01 | 447.0933 |
| 126 | 3-O-β-D-6''-acetylglucopyranoside quercetin                                          | 12.10 | M-H                  | C <sub>23</sub> H <sub>22</sub> O <sub>13</sub> | 0.86  | 505.0992 |
| 127 | myricetin                                                                            | 12.10 | M-H <sub>2</sub> O-H | C <sub>15</sub> H <sub>10</sub> O <sub>8</sub>  | 1.32  | 299.0201 |
| 128 | 6-O-feruloyl-D-glucopyranose                                                         | 12.21 | M-H                  | C <sub>16</sub> H <sub>20</sub> O <sub>9</sub>  | 3.78  | 355.1048 |
| 129 | ferulic acid                                                                         | 12.30 | M-H                  | C <sub>10</sub> H <sub>10</sub> O <sub>4</sub>  | 3.51  | 193.0513 |
| 130 | 4-hydroxy-4-(3'-hydroxyphenyl) butyric acid-4-O-β-D-glucopyranoside methyl ester     | 12.34 | M-H <sub>2</sub> O-H | C <sub>17</sub> H <sub>24</sub> O <sub>9</sub>  | 1.23  | 353.1247 |
| 131 | 4-[6-O-(4-hydroxy-3,5-dimethoxybenzoyl)-β-D-glucopyranosyloxy]-3-methoxybenzoic acid | 12.38 | M-H <sub>2</sub> O-H | C <sub>23</sub> H <sub>26</sub> O <sub>13</sub> | 3.18  | 491.1211 |
| 132 | 1,3-O-dicaffeoylquinic acid                                                          | 12.44 | M-H                  | C <sub>25</sub> H <sub>24</sub> O <sub>12</sub> | 2.20  | 497.1101 |
| 133 | juglone A                                                                            | 12.50 | M-H                  | C <sub>12</sub> H <sub>14</sub> O <sub>3</sub>  | 3.89  | 205.0878 |
| 134 | 3,7,8,3'-tetrahydroxy-4'-methoxyflavone                                              | 12.66 | M-H <sub>2</sub> O-H | C <sub>16</sub> H <sub>12</sub> O <sub>7</sub>  | 3.81  | 297.0417 |
| 135 | 3-Methylkaempferol                                                                   | 12.66 | M-H <sub>2</sub> O-H | C <sub>16</sub> H <sub>12</sub> O <sub>6</sub>  | 3.12  | 281.0465 |

|     |                                                                                                                                                                               |       |                      |                                                 |       |          |
|-----|-------------------------------------------------------------------------------------------------------------------------------------------------------------------------------|-------|----------------------|-------------------------------------------------|-------|----------|
| 136 | 1,3-dihydroxy-2-methylantraquinone                                                                                                                                            | 12.67 | M-H                  | C <sub>15</sub> H <sub>10</sub> O <sub>5</sub>  | 3.84  | 269.0466 |
| 137 | 2-hydroxy-3-methylantraquinone                                                                                                                                                | 12.67 | M+FA-H               | C <sub>15</sub> H <sub>10</sub> O <sub>3</sub>  | 1.97  | 283.0617 |
| 138 | Vitexin-2''-O-acetyl                                                                                                                                                          | 12.91 | M+FA-H               | C <sub>23</sub> H <sub>22</sub> O <sub>11</sub> | 1.82  | 519.1153 |
| 139 | isovitexin                                                                                                                                                                    | 13.03 | M-H                  | C <sub>21</sub> H <sub>20</sub> O <sub>10</sub> | 3.46  | 431.0999 |
| 140 | Vitexin-3''-O-acetyl                                                                                                                                                          | 13.04 | M-H                  | C <sub>23</sub> H <sub>22</sub> O <sub>11</sub> | 1.01  | 473.1094 |
| 141 | Wogonin                                                                                                                                                                       | 13.04 | M-H                  | C <sub>16</sub> H <sub>12</sub> O <sub>5</sub>  | 4.41  | 283.0624 |
| 142 | naringenin                                                                                                                                                                    | 13.10 | M-H                  | C <sub>15</sub> H <sub>12</sub> O <sub>5</sub>  | 3.38  | 271.0621 |
| 143 | Pinnatifinoside E                                                                                                                                                             | 13.10 | M+FA-H               | C <sub>23</sub> H <sub>20</sub> O <sub>10</sub> | 1.51  | 501.1045 |
| 144 | 3-O-glucoside-8-methoxy kaempferol                                                                                                                                            | 13.18 | M-H                  | C <sub>22</sub> H <sub>22</sub> O <sub>12</sub> | 1.72  | 459.0941 |
| 145 | (+)-catechin                                                                                                                                                                  | 13.23 | M-H                  | C <sub>15</sub> H <sub>14</sub> O <sub>6</sub>  | 3.80  | 289.0729 |
| 146 | SZY-7                                                                                                                                                                         | 13.23 | M-H                  | C <sub>30</sub> H <sub>26</sub> O <sub>11</sub> | 1.39  | 561.1410 |
| 147 | 3-O-glucoside-syringetin                                                                                                                                                      | 13.54 | M-H <sub>2</sub> O-H | C <sub>23</sub> H <sub>24</sub> O <sub>13</sub> | 4.19  | 489.1060 |
| 148 | 1-hydroxy-2-methyl-4-methoxyanthraquinone                                                                                                                                     | 13.58 | M-H <sub>2</sub> O-H | C <sub>16</sub> H <sub>12</sub> O <sub>4</sub>  | 2.81  | 249.0565 |
| 149 | Afzelin                                                                                                                                                                       | 13.77 | M+FA-H               | C <sub>21</sub> H <sub>20</sub> O <sub>10</sub> | 6.08  | 477.1065 |
| 150 | 8-C-glucosyl-rhamnosyl apigenin                                                                                                                                               | 13.90 | M-H                  | C <sub>27</sub> H <sub>30</sub> O <sub>14</sub> | -0.36 | 577.1561 |
| 151 | 4'-hydroxy-2'-methoxyphenol-1-O-β-D-(6-O-syringoyl)glucopyranoside                                                                                                            | 13.92 | M-H <sub>2</sub> O-H | C <sub>23</sub> H <sub>28</sub> O <sub>11</sub> | 4.39  | 461.1474 |
| 152 | 1-O-Benzoyl-alpha-D-glucopyranose                                                                                                                                             | 14.00 | M-H <sub>2</sub> O-H | C <sub>13</sub> H <sub>16</sub> O <sub>7</sub>  | 3.61  | 265.0728 |
| 153 | 1-O-(4-coumaroyl)-beta-D-glucose                                                                                                                                              | 14.01 | M-H                  | C <sub>15</sub> H <sub>18</sub> O <sub>8</sub>  | 4.52  | 325.0938 |
| 154 | 4-(1-hydroxy-1-methylethyl)-benzoic acid                                                                                                                                      | 14.01 | M-H <sub>2</sub> O-H | C <sub>10</sub> H <sub>12</sub> O <sub>3</sub>  | -1.93 | 161.0605 |
| 155 | quercetin-3-O-(4''-O-acetyl)-α-L-rhamnopyranoside                                                                                                                             | 14.18 | M-H                  | C <sub>23</sub> H <sub>22</sub> O <sub>12</sub> | 3.55  | 489.1056 |
| 156 | (5R,6S,7S,8S)-8-Acetoxy-6-hydroxy-1,2,3,13-tetramethoxy-6,7-dimethyl-5,6,7,8-tetrahydrobenzo[3',4']cycloocta[1',2':4,5]benzo[1,2-d][1,3]dioxol-5-yl(2Z)-2-methyl-2-butenolate | 14.38 | M-H                  | C <sub>30</sub> H <sub>36</sub> O <sub>11</sub> | 2.61  | 571.2200 |
| 157 | Picroside III                                                                                                                                                                 | 14.49 | M-H                  | C <sub>25</sub> H <sub>30</sub> O <sub>13</sub> | -2.14 | 583.1674 |
| 158 | Hendecanoic acid                                                                                                                                                              | 14.51 | M+FA-H               | C <sub>11</sub> H <sub>22</sub> O <sub>2</sub>  | 3.94  | 231.1609 |
| 159 | Pinnatifinoside C                                                                                                                                                             | 14.56 | M-H                  | C <sub>23</sub> H <sub>20</sub> O <sub>10</sub> | 1.99  | 455.0993 |



|     |                                                                                                 |       |                      |                                                 |       |          |
|-----|-------------------------------------------------------------------------------------------------|-------|----------------------|-------------------------------------------------|-------|----------|
| 160 | (6S,7E,9R)-6,9-Dihydroxy-4,7-megastigmadien-3-one-9-O-β-D-glucopyranoside                       | 14.58 | M-H                  | C <sub>19</sub> H <sub>30</sub> O <sub>8</sub>  | -2.02 | 385.1860 |
| 161 | Pinnatifinoside A                                                                               | 14.60 | M+FA-H               | C <sub>21</sub> H <sub>18</sub> O <sub>9</sub>  | 3.26  | 459.0946 |
| 162 | 1,4,8-trihydroxynaphthalenel-O-β-D-[6'-O-(4''-hydroxy-3'',5''-dimethoxybenzoyl)]glucopyranoside | 14.61 | M-H <sub>2</sub> O-H | C <sub>25</sub> H <sub>26</sub> O <sub>12</sub> | 2.15  | 499.1257 |
| 163 | Pinnatifinoside B                                                                               | 14.84 | M-H                  | C <sub>23</sub> H <sub>20</sub> O <sub>10</sub> | 4.82  | 455.1006 |
| 164 | taxifolin                                                                                       | 14.86 | M-H <sub>2</sub> O-H | C <sub>15</sub> H <sub>12</sub> O <sub>7</sub>  | 0.66  | 285.0407 |
| 165 | schizandriside                                                                                  | 14.89 | M+FA-H               | C <sub>25</sub> H <sub>32</sub> O <sub>10</sub> | 1.16  | 537.1983 |
| 166 | Benzyl 2-(hexopyranosyloxy)-6-hydroxybenzoate                                                   | 14.94 | M-H                  | C <sub>20</sub> H <sub>22</sub> O <sub>9</sub>  | 2.48  | 405.1201 |
| 167 | (4R)-4-hydroxy-α-tetralone                                                                      | 15.04 | M-H                  | C <sub>10</sub> H <sub>10</sub> O <sub>2</sub>  | -3.91 | 161.0602 |
| 168 | 5-O-rhamnosyl apigenin                                                                          | 15.15 | M+FA-H               | C <sub>21</sub> H <sub>20</sub> O <sub>9</sub>  | 2.16  | 461.1098 |
| 169 | glogoside                                                                                       | 15.22 | M-H <sub>2</sub> O-H | C <sub>22</sub> H <sub>22</sub> O <sub>12</sub> | 3.29  | 459.0949 |
| 170 | schaftosise                                                                                     | 15.27 | M-H <sub>2</sub> O-H | C <sub>26</sub> H <sub>28</sub> O <sub>14</sub> | 4.64  | 545.1327 |
| 171 | Pinnatifinoside D                                                                               | 15.41 | M-H                  | C <sub>23</sub> H <sub>20</sub> O <sub>10</sub> | 0.94  | 455.0988 |
| 172 | juglanone                                                                                       | 15.42 | M-H <sub>2</sub> O-H | C <sub>19</sub> H <sub>16</sub> O <sub>8</sub>  | 2.85  | 353.0677 |
| 173 | 7-O-glucoside apigenin                                                                          | 15.53 | M-H <sub>2</sub> O-H | C <sub>21</sub> H <sub>20</sub> O <sub>10</sub> | 2.15  | 413.0887 |
| 174 | tricin                                                                                          | 15.53 | M-H <sub>2</sub> O-H | C <sub>17</sub> H <sub>14</sub> O <sub>7</sub>  | 3.42  | 311.0572 |
| 175 | Vitexin-6''-O-acetyl                                                                            | 15.53 | M-H                  | C <sub>23</sub> H <sub>22</sub> O <sub>11</sub> | 2.62  | 473.1102 |
| 176 | 1-hydroxy-6-methyl-anthraquinone                                                                | 15.53 | M+FA-H               | C <sub>15</sub> H <sub>10</sub> O <sub>3</sub>  | 4.39  | 283.0622 |
| 177 | 3-O-rhamnosyl quercetin                                                                         | 15.58 | M-H                  | C <sub>21</sub> H <sub>20</sub> O <sub>11</sub> | -0.01 | 447.0933 |
| 178 | 6''-O-vanilloylisotachioside                                                                    | 15.59 | M-H <sub>2</sub> O-H | C <sub>21</sub> H <sub>24</sub> O <sub>11</sub> | 3.87  | 433.1158 |
| 179 | Hyperoside                                                                                      | 15.60 | M-H <sub>2</sub> O-H | C <sub>21</sub> H <sub>20</sub> O <sub>12</sub> | 2.36  | 445.0787 |
| 180 | 2'-hydroxy-4'-methoxyphenol-1-O-β-D-(6-O-syringoyl)glucopyranoside                              | 15.63 | M-H <sub>2</sub> O-H | C <sub>23</sub> H <sub>28</sub> O <sub>11</sub> | -2.64 | 461.1441 |
| 181 | 5-Hydroxy-3,7-dimethoxy-3',4'-methylenedioxyflavone                                             | 15.78 | M-H                  | C <sub>18</sub> H <sub>14</sub> O <sub>7</sub>  | -1.89 | 341.0675 |
| 182 | 5-p-cis-coumaroylquinic acid                                                                    | 15.82 | M-H                  | C <sub>16</sub> H <sub>18</sub> O <sub>8</sub>  | 3.38  | 337.0940 |
| 183 | engeletin                                                                                       | 15.97 | M-H <sub>2</sub> O-H | C <sub>21</sub> H <sub>22</sub> O <sub>11</sub> | 1.55  | 431.0991 |

|     |                                                                                                                                                                                |       |                      |                                                 |       |          |
|-----|--------------------------------------------------------------------------------------------------------------------------------------------------------------------------------|-------|----------------------|-------------------------------------------------|-------|----------|
| 184 | 2-cis-4-trans-abscisic acid                                                                                                                                                    | 16.04 | M-H                  | C <sub>15</sub> H <sub>20</sub> O <sub>4</sub>  | 4.59  | 263.1301 |
| 185 | apigenin                                                                                                                                                                       | 16.06 | M-H                  | C <sub>15</sub> H <sub>10</sub> O <sub>5</sub>  | 0.55  | 269.0457 |
| 186 | (6R,9R)-9-Hydroxymegastigman-4-en-3-one-9-O-β-D-glucopyranoside                                                                                                                | 16.14 | M-H                  | C <sub>19</sub> H <sub>32</sub> O <sub>7</sub>  | 3.43  | 371.2088 |
| 187 | 4-[7-(β-D-Glucopyranosyloxy)-5-hydroxy-3-({2-O-[(2E)-3-(4-hydroxy-3-methoxyphenyl)-2-propenoyl]-beta-D-glucopyranosyl}oxy)-4-oxo-4H-chromen-2-yl]phenyl beta-D-glucopyranoside | 16.21 | M+FA-H               | C <sub>43</sub> H <sub>48</sub> O <sub>24</sub> | 2.22  | 993.2539 |
| 188 | 5-methoxy-1,4-naphthoquinone                                                                                                                                                   | 16.31 | M-H                  | C <sub>11</sub> H <sub>8</sub> O <sub>3</sub>   | -1.24 | 187.0398 |
| 189 | Linalyl rutinoside                                                                                                                                                             | 16.43 | M-H                  | C <sub>22</sub> H <sub>38</sub> O <sub>10</sub> | 0.07  | 461.2393 |
| 190 | 2,3-dihydro-2-(4'-O-β-D-glucopyranosyl-3'-methoxy-phenyl)-3-hydroxymethyl-5-(3-hydroxypropyl)-7-methoxybenzofuran                                                              | 16.52 | M+FA-H               | C <sub>26</sub> H <sub>34</sub> O <sub>11</sub> | -4.58 | 567.2059 |
| 191 | cantonienol                                                                                                                                                                    | 16.64 | M+FA-H               | C <sub>15</sub> H <sub>26</sub> O <sub>3</sub>  | 3.34  | 299.1872 |
| 192 | Pinnatifinoside B                                                                                                                                                              | 16.71 | M-H                  | C <sub>23</sub> H <sub>20</sub> O <sub>10</sub> | 1.51  | 455.0991 |
| 193 | 4-(5,7-Dihydroxy-4-oxo-4H-chromen-2-yl)phenyl 6-O-[(2E)-3-(4-hydroxyphenyl)-2-propenoyl]-beta-L-glucopyranoside                                                                | 16.71 | M-H                  | C <sub>30</sub> H <sub>26</sub> O <sub>12</sub> | 3.36  | 623.1419 |
| 194 | Dihydrokaempferol 3-O-rhamnoside                                                                                                                                               | 16.72 | M-H                  | C <sub>21</sub> H <sub>20</sub> O <sub>10</sub> | 0.32  | 413.0879 |
| 195 | 3,4'-dihydroxy-5,6,7-trimethoxyflavones                                                                                                                                        | 16.85 | M-H <sub>2</sub> O-H | C <sub>18</sub> H <sub>16</sub> O <sub>7</sub>  | 1.90  | 325.0724 |
| 196 | kakispyrol                                                                                                                                                                     | 16.89 | M-H                  | C <sub>20</sub> H <sub>24</sub> O <sub>9</sub>  | 4.12  | 407.1364 |
| 197 | (1'R,3'R,5'R,8'S)-epi-dihydrophaseic acid-β-D-glucoside                                                                                                                        | 16.92 | M-H <sub>2</sub> O-H | C <sub>21</sub> H <sub>32</sub> O <sub>10</sub> | 1.26  | 425.1823 |
| 198 | 4-[(4R-4-(β-D-glucopyranosyloxy)-2,6,6-Trimethyl-1-cyclohexen-1-yl]-2-butanone                                                                                                 | 17.00 | M+FA-H               | C <sub>19</sub> H <sub>32</sub> O <sub>7</sub>  | 3.62  | 417.2144 |
| 199 | 3-deoxidization-isoquercetin                                                                                                                                                   | 17.36 | M-H                  | C <sub>22</sub> H <sub>22</sub> O <sub>10</sub> | -2.89 | 445.1127 |
| 200 | Erythro-guaiacylglycerol-β-O-4'-coniferyl alcohol                                                                                                                              | 17.41 | M+FA-H               | C <sub>20</sub> H <sub>24</sub> O <sub>7</sub>  | 2.61  | 421.1514 |
| 201 | roseoside                                                                                                                                                                      | 17.44 | M-H <sub>2</sub> O-H | C <sub>19</sub> H <sub>30</sub> O <sub>8</sub>  | 4.11  | 367.1778 |
| 202 | 4-(4-Hydroxy-2,6,6-trimethyl-1-cyclohexen-1-yl)-2-butanyl 6-O-[3,4-dihydroxy-4-(hydroxymethyl)tetrahydro-2-furanyl]hexopyranoside                                              | 17.67 | M-H <sub>2</sub> O-H | C <sub>24</sub> H <sub>42</sub> O <sub>11</sub> | 2.12  | 487.2559 |
| 203 | Myristic acid                                                                                                                                                                  | 17.72 | M-H                  | C <sub>14</sub> H <sub>28</sub> O <sub>2</sub>  | 1.47  | 227.2020 |

|     |                                                                                                                                                                                                                                |       |                      |                                                 |       |          |
|-----|--------------------------------------------------------------------------------------------------------------------------------------------------------------------------------------------------------------------------------|-------|----------------------|-------------------------------------------------|-------|----------|
| 204 | Madecassic acid                                                                                                                                                                                                                | 18.31 | M-H                  | C <sub>30</sub> H <sub>48</sub> O <sub>6</sub>  | -0.73 | 549.3435 |
| 205 | 11-hydroxy-2,4-cycloeudesman-8-one                                                                                                                                                                                             | 18.34 | M+FA-H               | C <sub>15</sub> H <sub>24</sub> O <sub>2</sub>  | 4.22  | 281.1768 |
| 206 | 10,11-Dihydroxy-2,2,6 $\alpha$ ,6 $\beta$ ,12 $\alpha$ -pentamethyl-9-methylene-1,3,4,5,6,6 $\alpha$ ,6 $\beta$ ,7,8,8 $\alpha$ ,9,10,11,12,12 $\alpha$ ,12 $\beta$ ,13,14 $\beta$ -octadecahydro-2H-picene-4a-carboxylic acid | 18.41 | M+FA-H               | C <sub>29</sub> H <sub>44</sub> O <sub>4</sub>  | 0.19  | 501.3223 |
| 207 | 2 $\alpha$ ,3 $\beta$ ,19 $\alpha$ -thihydroxyl ursolic acid                                                                                                                                                                   | 19.14 | M-H                  | C <sub>30</sub> H <sub>48</sub> O <sub>5</sub>  | 0.07  | 487.3429 |
| 208 | 2-[(3 $\beta$ ,5 $\alpha$ ,6 $\beta$ )-3-[(3-Carboxypropanoyl)oxy]-5-hydroxycholestan-6-yl]oxy)carbonyl]benzoic acid                                                                                                           | 19.34 | M-H <sub>2</sub> O-H | C <sub>39</sub> H <sub>56</sub> O <sub>9</sub>  | 2.31  | 649.3762 |
| 209 | 3-O-trans-p-Coumaroyltormentic acid                                                                                                                                                                                            | 19.60 | M-H                  | C <sub>39</sub> H <sub>54</sub> O <sub>7</sub>  | 2.22  | 679.3878 |
| 210 | (2 $\alpha$ ,3 $\beta$ )-2,19-Dihydroxy-3-[[2(Z)-3-(4-hydroxy-3-methoxyphenyl)-2-propenoyl]oxy]urs-12-en-28-oic acid                                                                                                           | 19.69 | M-H                  | C <sub>40</sub> H <sub>56</sub> O <sub>8</sub>  | -2.69 | 663.3885 |
| 211 | (2 $\alpha$ ,3 $\beta$ )-2,19-Dihydroxy-3-[[2(Z)-3-(4-hydroxyphenyl)-2-propenoyl]oxy]urs-12-en-28-oic acid                                                                                                                     | 19.81 | M+FA-H               | C <sub>39</sub> H <sub>54</sub> O <sub>7</sub>  | 2.98  | 679.3871 |
| 212 | (3 $\beta$ ,5 $\alpha$ )-3-Hydroxy-27-[[2(E)-3-(4-hydroxyphenyl)-2-propenoyl]oxy]urs-12-en-28-oic acid                                                                                                                         | 20.03 | M+FA-H               | C <sub>39</sub> H <sub>54</sub> O <sub>6</sub>  | 4.35  | 663.3929 |
| 213 | Jacoumaric acid                                                                                                                                                                                                                | 20.03 | M-H                  | C <sub>39</sub> H <sub>54</sub> O <sub>6</sub>  | -1.09 | 617.3841 |
| 214 | Ulmicin E                                                                                                                                                                                                                      | 20.22 | M-H <sub>2</sub> O-H | C <sub>45</sub> H <sub>60</sub> O <sub>7</sub>  | 5.94  | 693.4203 |
| 215 | (3 $\beta$ ,12 $\beta$ ,20Z)-12-Hydroxydammar-20(22),24-dien-3-yl 2-O-(6-O-acetyl-beta-D-glucopyranosyl)-beta-D-glucopyranoside                                                                                                | 20.27 | M+FA-H               | C <sub>44</sub> H <sub>72</sub> O <sub>13</sub> | -8.43 | 853.4887 |
| 216 | (3 $\beta$ ,5 $\alpha$ ,9 $\alpha$ ,14 $\beta$ )-3-Hydroxy-27-[[2(E)-3-(4-hydroxyphenyl)-2-propenoyl]oxy]urs-12-en-28-oic acid                                                                                                 | 20.30 | M-H                  | C <sub>39</sub> H <sub>54</sub> O <sub>6</sub>  | 1.56  | 617.3857 |

Table S2 The the content of eight flavonoids compounds of the leaves of CS, CA and CK

| NO     | Harvesting Date    | Epicatechin                          | Quercetin       | Vitexin             | Isoquercetin        | Hyperoside          | Vitexin-2"-O-<br>rhamnosyl | Vitexin-2"-O-<br>-glucosyl | Rutin              |
|--------|--------------------|--------------------------------------|-----------------|---------------------|---------------------|---------------------|----------------------------|----------------------------|--------------------|
|        |                    | $\mu\text{g/g}$ (n=3, mean $\pm$ SD) |                 |                     |                     |                     |                            |                            |                    |
| CS-8-1 | August 10, 2020    | 808.64 $\pm$ 27.03                   | 0.53 $\pm$ 0.01 | 148.18 $\pm$ 3.9    | 133.68 $\pm$ 3.14   | 286.24 $\pm$ 7.84   | 6914.98 $\pm$ 193.59       | 40.22 $\pm$ 1.04           | 145.46 $\pm$ 3.11  |
| CS-8-2 | August 13, 2020    | 638.85 $\pm$ 2.92                    | 0.48 $\pm$ 0.01 | 192.38 $\pm$ 2.71   | 73.81 $\pm$ 2.42    | 203.72 $\pm$ 7.60   | 7276.68 $\pm$ 33.27        | 40.69 $\pm$ 0.49           | 151.27 $\pm$ 3.16  |
| CS-8-3 | August 20, 2020    | 621.15 $\pm$ 12.43                   | 1.08 $\pm$ 0.02 | 142.14 $\pm$ 2.66   | 172.54 $\pm$ 2.87   | 353.83 $\pm$ 6.42   | 6332.8 $\pm$ 61.99         | 34.16 $\pm$ 0.59           | 190.49 $\pm$ 5.37  |
| CS-8-4 | August 27, 2020    | 1390.47 $\pm$ 42.83                  | 1.72 $\pm$ 0.03 | 291.71 $\pm$ 1.71   | 643.34 $\pm$ 21.43  | 909.41 $\pm$ 1.75   | 6744.34 $\pm$ 12.26        | 36.48 $\pm$ 0.63           | 193.79 $\pm$ 1.54  |
| CS-9-1 | September 03, 2020 | 1100.78 $\pm$ 30.07                  | 0.38 $\pm$ 0.01 | 230.00 $\pm$ 3.11   | 106.06 $\pm$ 3.90   | 212.26 $\pm$ 6.94   | 7085.72 $\pm$ 152.92       | 38.57 $\pm$ 1.16           | 219.80 $\pm$ 4.96  |
| CS-9-2 | September 10, 2020 | 2185.15 $\pm$ 31.07                  | 1.08 $\pm$ 0.02 | 342.78 $\pm$ 7.47   | 497.06 $\pm$ 12.79  | 916.98 $\pm$ 22.37  | 8192.38 $\pm$ 107.94       | 45.82 $\pm$ 1.02           | 269.55 $\pm$ 7.07  |
| CS-9-3 | September 17, 2020 | 2691.45 $\pm$ 17.04                  | 1.85 $\pm$ 0.06 | 223.47 $\pm$ 4.67   | 634.82 $\pm$ 17.87  | 1180.74 $\pm$ 34.08 | 6728.38 $\pm$ 73.28        | 37.96 $\pm$ 1.20           | 242.66 $\pm$ 6.23  |
| CS-9-4 | September 26, 2020 | 2718.77 $\pm$ 61.36                  | 4.90 $\pm$ 0.11 | 402.51 $\pm$ 7.18   | 2290.16 $\pm$ 77.33 | 3315.03 $\pm$ 79.53 | 5953.62 $\pm$ 140.67       | 31.35 $\pm$ 0.90           | 348.83 $\pm$ 11.18 |
| CS-9-5 | September 30, 2020 | 794.64 $\pm$ 24.32                   | 3.08 $\pm$ 0.07 | 267.66 $\pm$ 8.56   | 987.18 $\pm$ 14.99  | 1842.85 $\pm$ 47.58 | 6632.23 $\pm$ 185.67       | 39.24 $\pm$ 0.32           | 223.06 $\pm$ 5.57  |
| CK-8-1 | August 10, 2020    | 1473.75 $\pm$ 20.15                  | 2.34 $\pm$ 0.08 | 1994.24 $\pm$ 27.9  | 570.66 $\pm$ 20.19  | 873.72 $\pm$ 6.40   | 1.25 $\pm$ 0.050           | ND                         | 35.63 $\pm$ 1.63   |
| CK-8-2 | August 13, 2020    | 1752.55 $\pm$ 28.59                  | 2.43 $\pm$ 0.05 | 2302.84 $\pm$ 85.74 | 679.57 $\pm$ 16.10  | 1064.49 $\pm$ 25.86 | 66.08 $\pm$ 0.50           | ND                         | 25.89 $\pm$ 1.13   |
| CK-8-3 | August 20, 2020    | 2139.34 $\pm$ 7.60                   | 2.71 $\pm$ 0.05 | 2555.83 $\pm$ 15.21 | 705.83 $\pm$ 28.33  | 1014.45 $\pm$ 16.32 | 1.14 $\pm$ 0.04            | ND                         | 29.86 $\pm$ 1.26   |
| CK-8-4 | August 27, 2020    | 1832.94 $\pm$ 35.94                  | 1.74 $\pm$ 0.03 | 1845.95 $\pm$ 33.52 | 407.95 $\pm$ 4.52   | 628.79 $\pm$ 17.45  | 23.2 $\pm$ 0.78            | ND                         | 18.00 $\pm$ 0.33   |
| CK-9-1 | September 03, 2020 | 2712.82 $\pm$ 97.82                  | 2.32 $\pm$ 0.05 | 2300.34 $\pm$ 93.74 | 968.22 $\pm$ 151.14 | 1331.66 $\pm$ 40.95 | 0.95 $\pm$ 0.02            | ND                         | 73.82 $\pm$ 6.46   |
| CK-9-2 | September 10, 2020 | 2598.81 $\pm$ 26.78                  | 1.74 $\pm$ 0.05 | 2022.95 $\pm$ 47.76 | 491.51 $\pm$ 7.73   | 728.84 $\pm$ 16.45  | 25.76 $\pm$ 1.05           | ND                         | 92.26 $\pm$ 1.88   |
| CK-9-3 | September 17, 2020 | 2350.38 $\pm$ 49.03                  | 4.26 $\pm$ 0.05 | 1783.82 $\pm$ 9.00  | 1200.94 $\pm$ 42.46 | 1756.68 $\pm$ 38.01 | ND                         | ND                         | 60.24 $\pm$ 0.79   |

|         |                    |               |            |               |               |               |              |           |             |
|---------|--------------------|---------------|------------|---------------|---------------|---------------|--------------|-----------|-------------|
| CK-9-4  | September 26, 2020 | 4204.71±42.47 | 3.69±0.09  | 2465.48±26.8  | 1262.96±30.03 | 1732.42±20.9  | 1.77±0.03    | ND        | 133.03±1.82 |
| CK-9-5  | September 30, 2020 | 4307.55±80.09 | 4.25±0.09  | 2505.88±67.59 | 1136.46±25.82 | 1380.93±22.66 | ND           | ND        | 259.94±3.41 |
| CK-10-1 | October 08, 2020   | 2946.65±57.97 | 8.13±0.33  | 2611.04±93.77 | 1651.57±33.38 | 2401.79±18.23 | ND           | ND        | 102.11±2.67 |
| CK-10-2 | October 15, 2020   | 2518.4±35.63  | 10.67±0.07 | 2981.61±75.07 | 2164.78±72.96 | 2963.52±67.38 | ND           | ND        | 86.73±2.26  |
| CA-8-1  | August 10, 2020    | 56.06±0.26    | 0.00±0.00  | 42.29±1.11    | 9.49±0.26     | 17.41±0.09    | ND           | ND        | 0.63±0.01   |
| CA-8-2  | August 13, 2020    | 16.23±0.55    | 0.00±0.00  | 18.96±0.59    | 8.50±0.10     | 13.56±11.75   | 300.52±10.73 | 2.50±0.11 | 4.11±0.15   |
| CA-8-3  | August 20, 2020    | 112.93±1.70   | 0.00±0.00  | 62.72±1.71    | 9.48±0.19     | 16.96±0.27    | ND           | ND        | 0.90±0.02   |
| CA-8-4  | August 27, 2020    | 113.98±3.74   | 0.00±0.00  | 63.00±2.19    | 2.71±0.15     | 4.81±0.17     | ND           | ND        | 0.00±0.00   |
| CA-9-1  | September 03, 2020 | 3000.74±48.07 | 1.54±0.04  | 2914.44±36.21 | 543.85±14.33  | 791.33±21.79  | 0.93±0.04    | ND        | 114.88±2.04 |
| CA-9-2  | September 10, 2020 | 2490.39±31.07 | 1.54±0.01  | 1279.81±61.52 | 444.52±17.05  | 633.17±28.69  | 0.62±0.01    | ND        | 18.15±0.11  |
| CA-9-3  | September 17, 2020 | 4043.36±44.86 | 0.00±0.00  | 1898.88±15.99 | 762.48±21.8   | 1036.58±3.13  | 0.62±0.01    | ND        | 34.76±1.35  |
| CA-9-4  | September 26, 2020 | 3663.53±94.73 | 3.09±0.05  | 1677.74±23.28 | 1070.91±24.83 | 1350.12±2.61  | 0.57±0.02    | ND        | 31.45±1.00  |
| CA-9-5  | September 30, 2020 | 4360.72±81.77 | 2.99±0.04  | 1842.8±28.48  | 742.47±5.74   | 955.75±17.60  | ND           | ND        | 121.54±4.98 |
| CA-10-1 | October 08, 2020   | 3353.22±49.96 | 4.26±0.03  | 1743.5±48.91  | 1061.52±35.96 | 1359.12±18.96 | ND           | ND        | 29.34±0.93  |
| CA-10-2 | October 15, 2020   | 2972.34±53.56 | 6.75±0.15  | 2286±61.85    | 1472.27±26.68 | 2169.16±53.13 | ND           | ND        | 179.76±6.12 |

\* ND not detected

Table S3 The the content of eight flavonoids compounds of different parts of CS and CK

| NO                                   | Epicatechin         | Quercetin       | Vitexin            | Isoquercetin        | Hyperoside          | Vitexin-2"-O-rhamnosyl | Vitexin-2"-O-glucosyl | Rutin             | Summary content      |
|--------------------------------------|---------------------|-----------------|--------------------|---------------------|---------------------|------------------------|-----------------------|-------------------|----------------------|
| $\mu\text{g/g}$ (n=3, mean $\pm$ SD) |                     |                 |                    |                     |                     |                        |                       |                   |                      |
| CK-leaf                              | 2350.38 $\pm$ 49.03 | 4.26 $\pm$ 0.05 | 1783.82 $\pm$ 9.00 | 1200.94 $\pm$ 42.46 | 1756.68 $\pm$ 38.01 | ND                     | ND                    | 60.24 $\pm$ 0.79  | 7156.31 $\pm$ 139.33 |
| CS-leaf                              | 2691.45 $\pm$ 17.04 | 1.85 $\pm$ 0.06 | 223.47 $\pm$ 4.67  | 634.82 $\pm$ 17.87  | 1180.74 $\pm$ 34.08 | 6728.38 $\pm$ 73.28    | 37.96 $\pm$ 1.20      | 242.66 $\pm$ 6.23 | 11741.31 $\pm$ 28.37 |
| CK-branch                            | 1455.87 $\pm$ 16.92 | 0.48 $\pm$ 0.08 | 117.91 $\pm$ 3.05  | 130.23 $\pm$ 3.65   | 288.81 $\pm$ 4.53   | ND                     | ND                    | 3.76 $\pm$ 0.13   | 1997.07 $\pm$ 27.99  |
| CS-branch                            | 1024.65 $\pm$ 36.29 | 2.93 $\pm$ 0.24 | 101.88 $\pm$ 3.35  | 126.09 $\pm$ 11.2   | 301.64 $\pm$ 11.81  | ND                     | ND                    | 3.24 $\pm$ 0.09   | 1560.43 $\pm$ 154.44 |
| CK-fruit                             | 269.64 $\pm$ 12.42  | 0.56 $\pm$ 0.08 | 10.85 $\pm$ 0.32   | 100.74 $\pm$ 5.23   | 219.99 $\pm$ 7.85   | 74.56 $\pm$ 1.62       | 0.34 $\pm$ 0.03       | 11.7 $\pm$ 0.44   | 688.39 $\pm$ 62.98   |
| CS-fruit                             | 405.99 $\pm$ 13.26  | 0.54 $\pm$ 0.03 | 50.58 $\pm$ 1.89   | 39.36 $\pm$ 2.20    | 53.3 $\pm$ 1.70     | 0.10 $\pm$ 0.02        | ND                    | 4.33 $\pm$ 0.31   | 554.19 $\pm$ 19.41   |

\* ND not detected
